# Supplementary material for: Role of the auxiliary ligand in determining the genotoxicity and mode of cell death of thiosemicarbazone Pd(ii) complexes
Source: Royal Society of Chemistry journal article supplement (doi:10.1039/d4dt00032c), 2024-01-01
Supplement: d4dt00032c1.pdf [file d4dt00032c1.pdf]

## Supporting information

### **Role of the auxiliary ligand in determining the genotoxicity and mode of cell death of Pd(II) complexes with thiosemicarbazone**

Ahmed M. Mansour,<sup>\*a1</sup> Rabaa M. Khaled,<sup>b1</sup> Krzysztof Radacki,<sup>c</sup> Mona A. M. Abo-Zeid,<sup>d,e</sup> Ola R Shehab,<sup>b</sup> Gamal A. E. Mostafa,<sup>f</sup> Essam A. Ali,<sup>f</sup> and Mahmoud T. Abo-Elfadl,<sup>d,e</sup>

---

<sup>a.</sup> *Department of Chemistry, United Arab Emirates University, Al-Ain, United Arab Emirates.*

[Mansour\\_am@uaeu.ac.ae](mailto:Mansour_am@uaeu.ac.ae); [inorganic\\_am@yahoo.com](mailto:inorganic_am@yahoo.com)

<sup>b.</sup> *Department of Chemistry, Faculty of Science, Cairo University, Gamma Street, Giza, Cairo 12613, Egypt.*

<sup>c.</sup> *Institut für Anorganische Chemie, Julius-Maximilians-Universität Würzburg, Am Hubland, D-97074 Würzburg, Germany.*

<sup>d.</sup> *Cancer Biology and Genetics Laboratory, Centre of Excellence for Advanced Sciences, National Research Centre, Dokki, Cairo 12622, Egypt*

<sup>e.</sup> *Biochemistry Department, Biotechnology Research Institute, National Research Centre, Dokki, Cairo 12622, Egypt.*

<sup>f.</sup> *Department of Pharmaceutical Chemistry, College of Pharmacy, King Saud University, Riyadh 11451, Saudi Arabia.*

<sup>1</sup> equal contribution.

|                 |                                                                                                                                        |            |
|-----------------|----------------------------------------------------------------------------------------------------------------------------------------|------------|
| <b>Fig. S1</b>  | <sup>1</sup> H NMR spectrum of thiosemicarbazone ligand a) whole spectrum and b) zoomed spectrum.                                      | <b>S3</b>  |
| <b>Fig. S2</b>  | IR spectra of the Pd(II) complexes a) <b>3</b> , b) <b>4</b> , c) <b>5</b> , and d) <b>6</b> .                                         | <b>S4</b>  |
| <b>Fig. S3</b>  | <sup>1</sup> H NMR spectrum of <b>3</b> .                                                                                              | <b>S6</b>  |
| <b>Fig. S4</b>  | <sup>1</sup> H NMR spectrum of <b>4</b> .                                                                                              | <b>S7</b>  |
| <b>Fig. S5</b>  | <sup>1</sup> H NMR spectrum of <b>5</b> .                                                                                              | <b>S8</b>  |
| <b>Fig. S6</b>  | <sup>1</sup> H NMR spectrum of <b>6</b> .                                                                                              | <b>S9</b>  |
| <b>Fig. S7</b>  | <sup>13</sup> C NMR spectrum of <b>3</b> .                                                                                             | <b>S10</b> |
| <b>Fig. S8</b>  | <sup>13</sup> C NMR spectrum of <b>6</b> .                                                                                             | <b>S11</b> |
| <b>Fig. S9</b>  | IR spectrum of <b>7</b> .                                                                                                              | <b>S12</b> |
| <b>Fig. S10</b> | NMR spectra of <b>7</b> a) <sup>1</sup> H and b) <sup>13</sup> C.                                                                      | <b>S13</b> |
| <b>Fig. S11</b> | IR spectrum of <b>8</b> .                                                                                                              | <b>S14</b> |
| <b>Fig. S12</b> | <sup>1</sup> H NMR spectrum of <b>8</b> .                                                                                              | <b>S15</b> |
| <b>Fig. S13</b> | <sup>13</sup> C NMR spectrum of <b>8</b> .                                                                                             | <b>S16</b> |
| <b>Fig. S14</b> | The local minimum structures of <b>3–8</b> calculated at B3LYP/LANL2DZ level of theory. (Hydrogen-atoms were omitted for the clarity). | <b>S17</b> |
| <b>Fig. S15</b> | Electronic absorption spectra of <b>3–8</b> in DMF.                                                                                    | <b>S18</b> |
| <b>Fig. S16</b> | Selective frontier molecular orbitals of <b>3–8</b> .                                                                                  | <b>S20</b> |
| <b>Fig. S17</b> | TDDFT spectra of S- and N1 isomers of <b>8</b> .                                                                                       | <b>S21</b> |
| <b>Fig. S18</b> | The dose response curves of <b>2–8</b> on five different cell lines.                                                                   | <b>S22</b> |

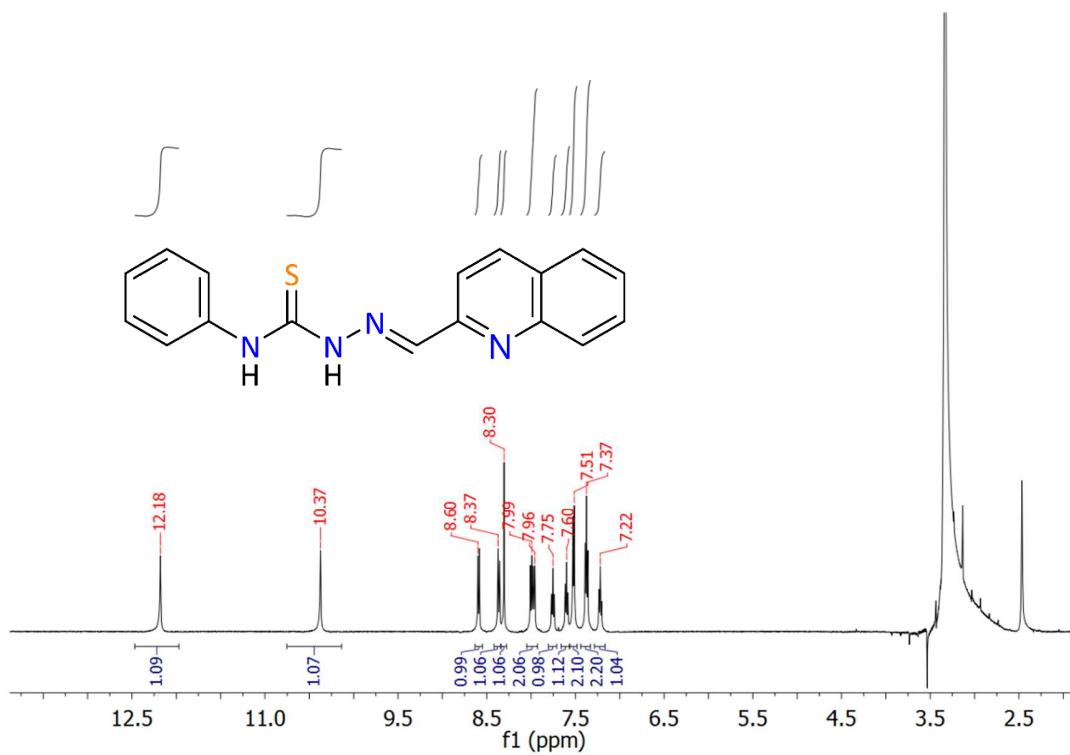

a)

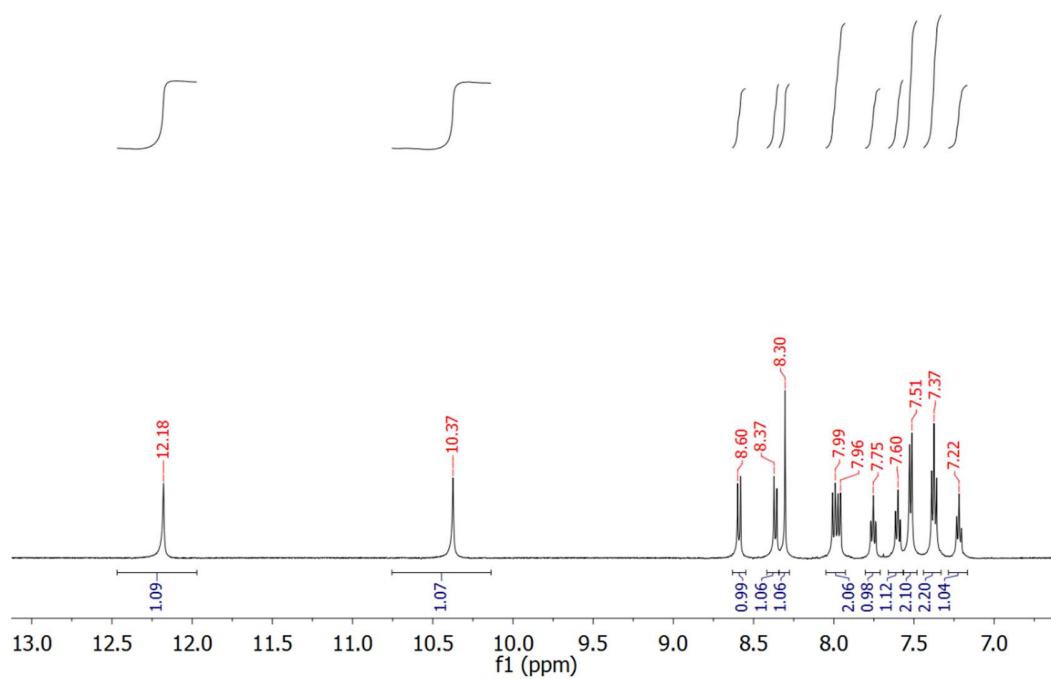

b)

**Fig. S1**  $^1\text{H}$  NMR spectrum of thiosemicarbazone ligand **a)** whole spectrum and **b)** zoomed spectrum.

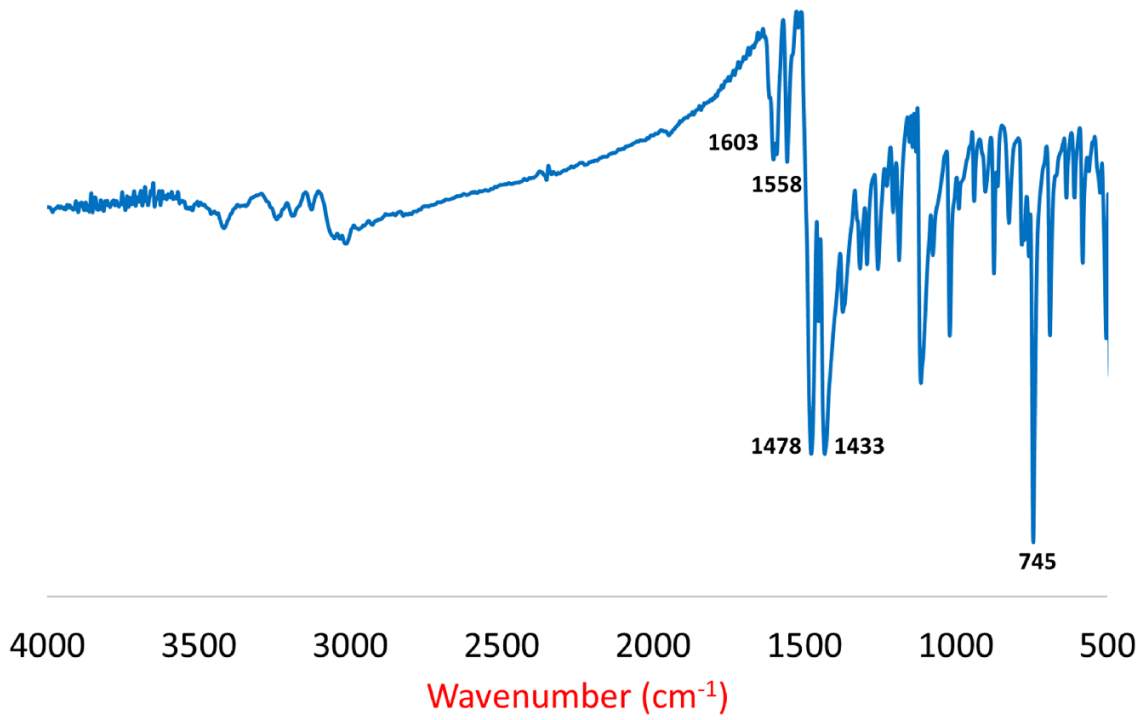

a)

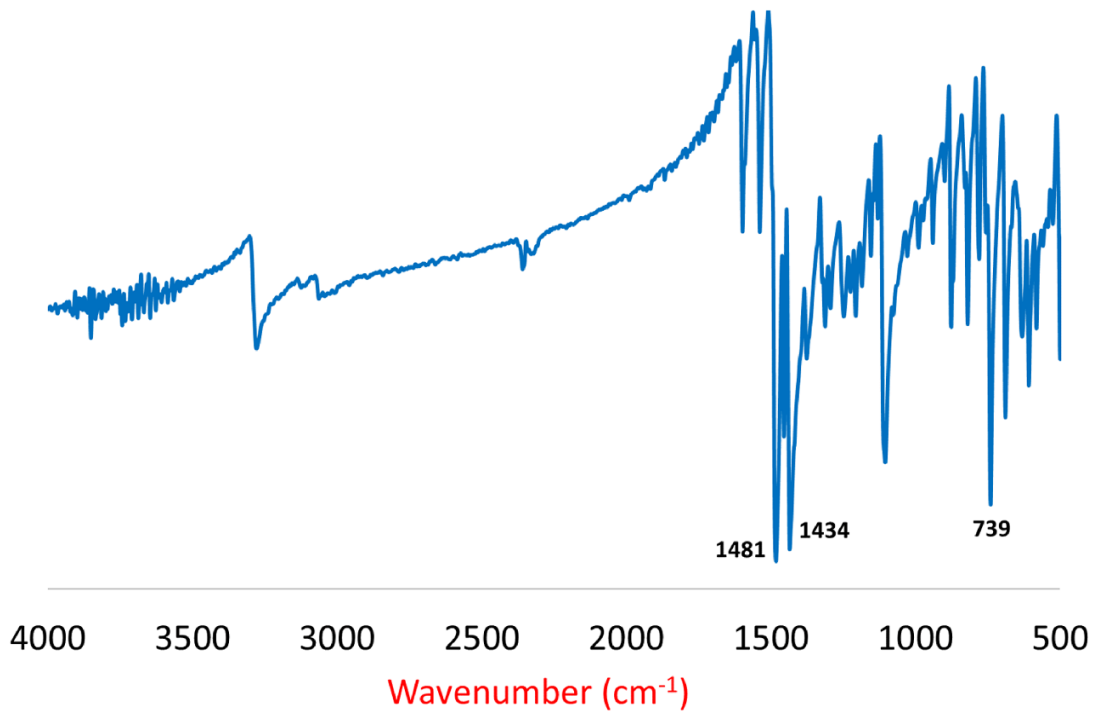

b)

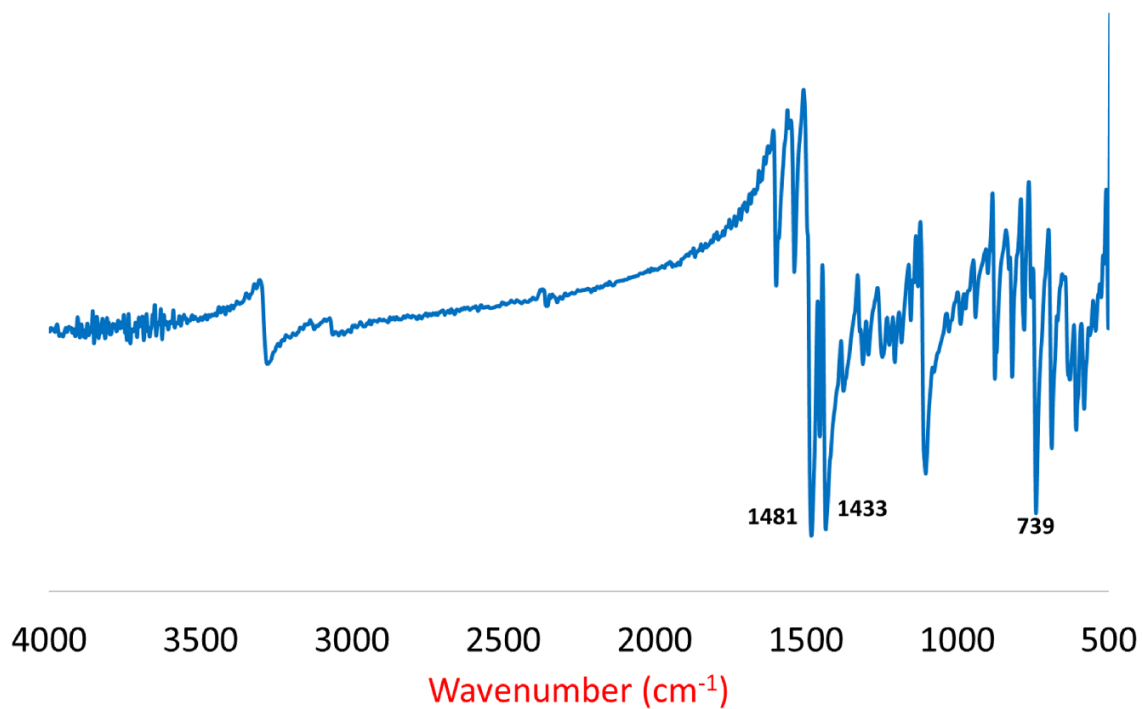

c)

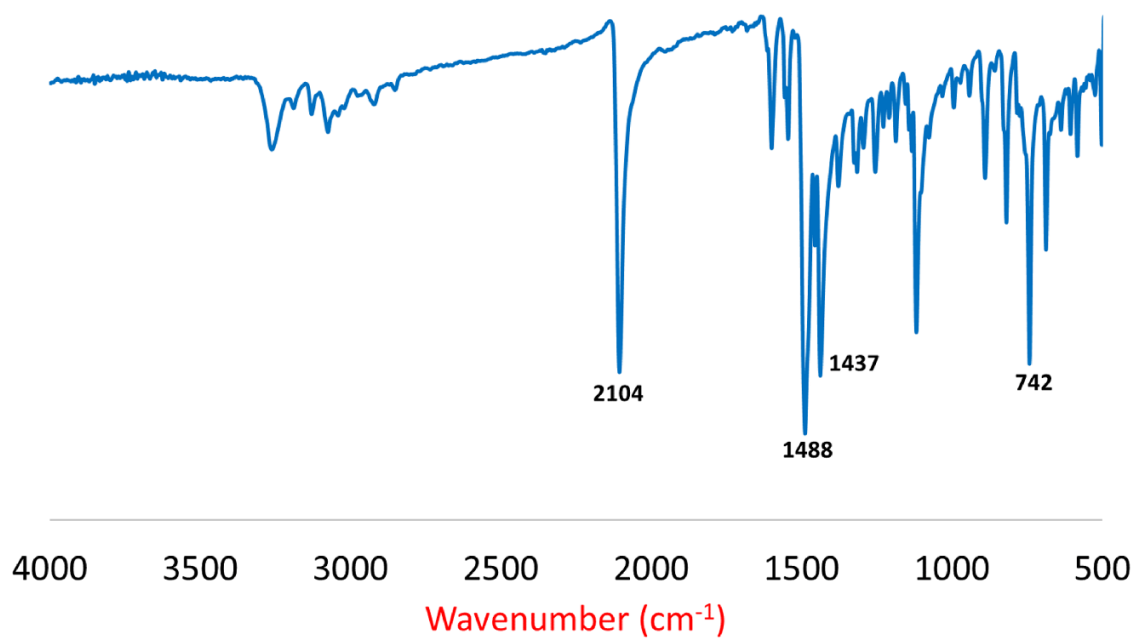

d)

Fig. S2 IR spectra of the Pd(II) complexes a) 3, b) 4, c) 5, and d) 6.

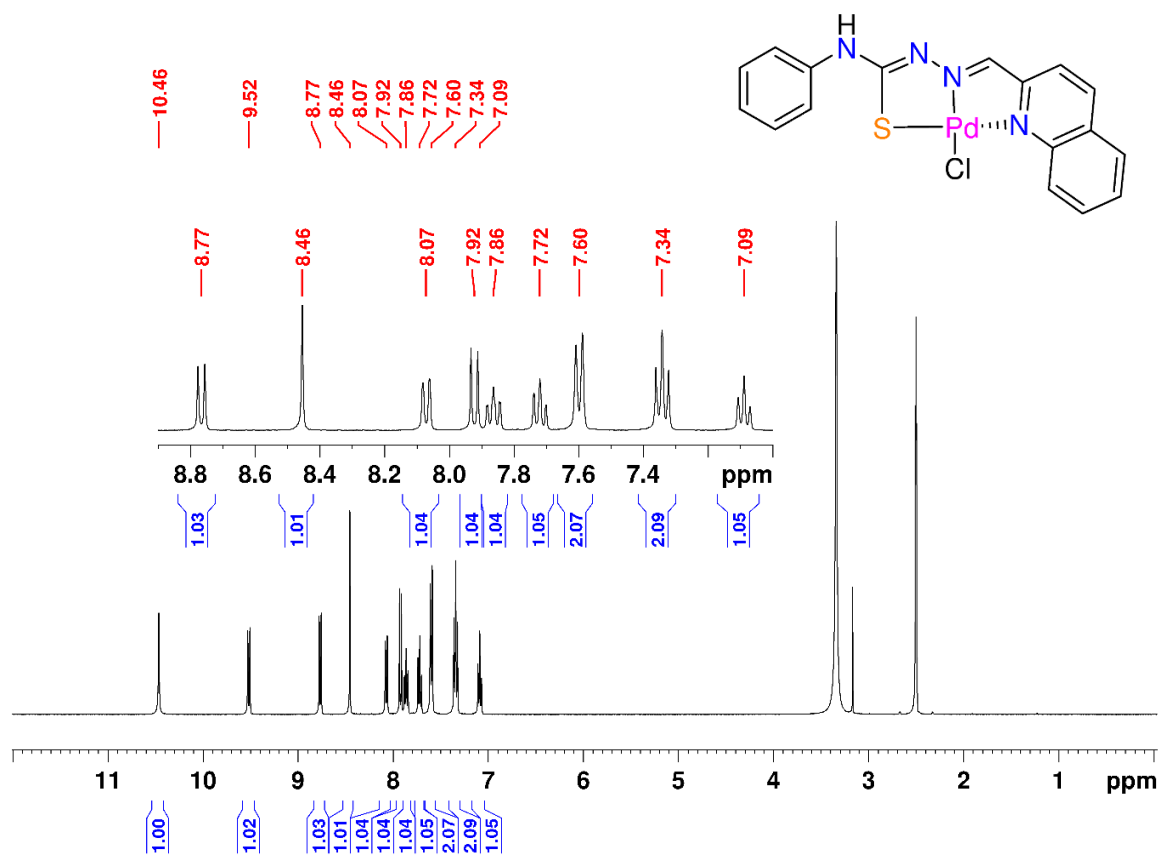

Fig. S3. <sup>1</sup>H NMR spectrum of 3.

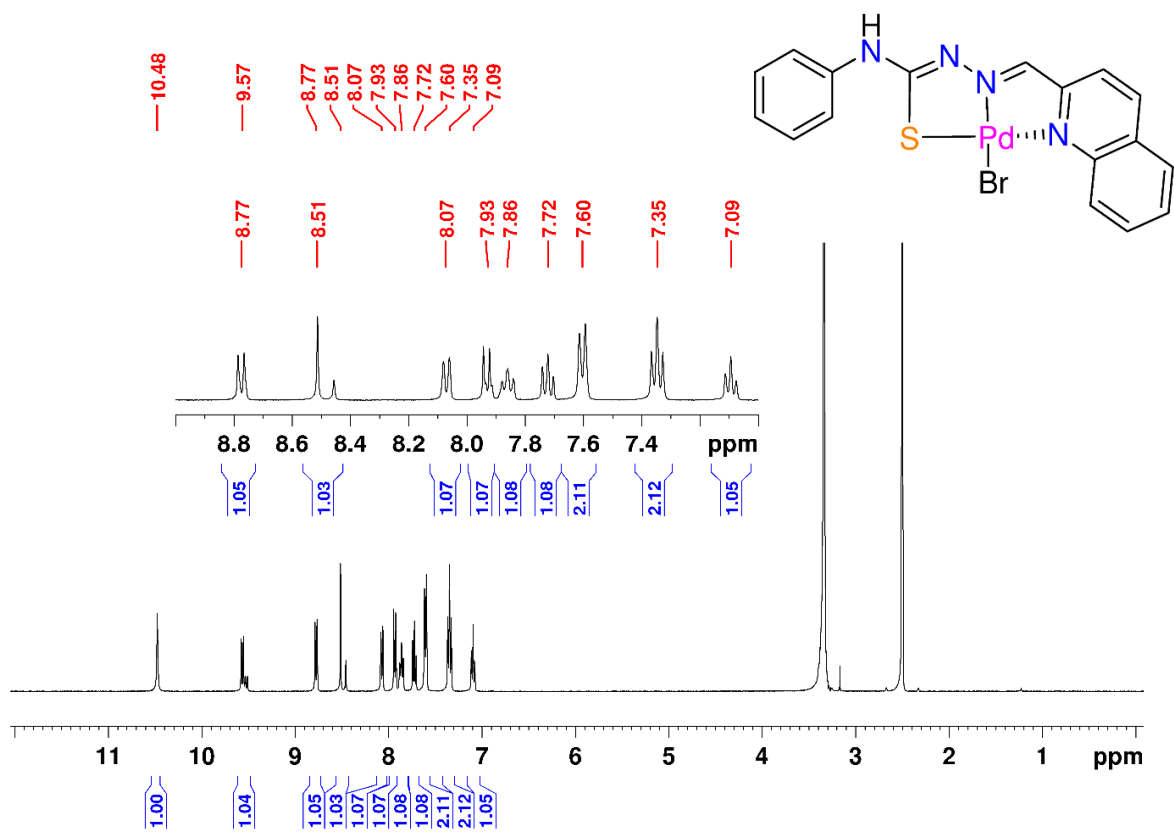

Fig. S4. <sup>1</sup>H NMR spectrum of 4.

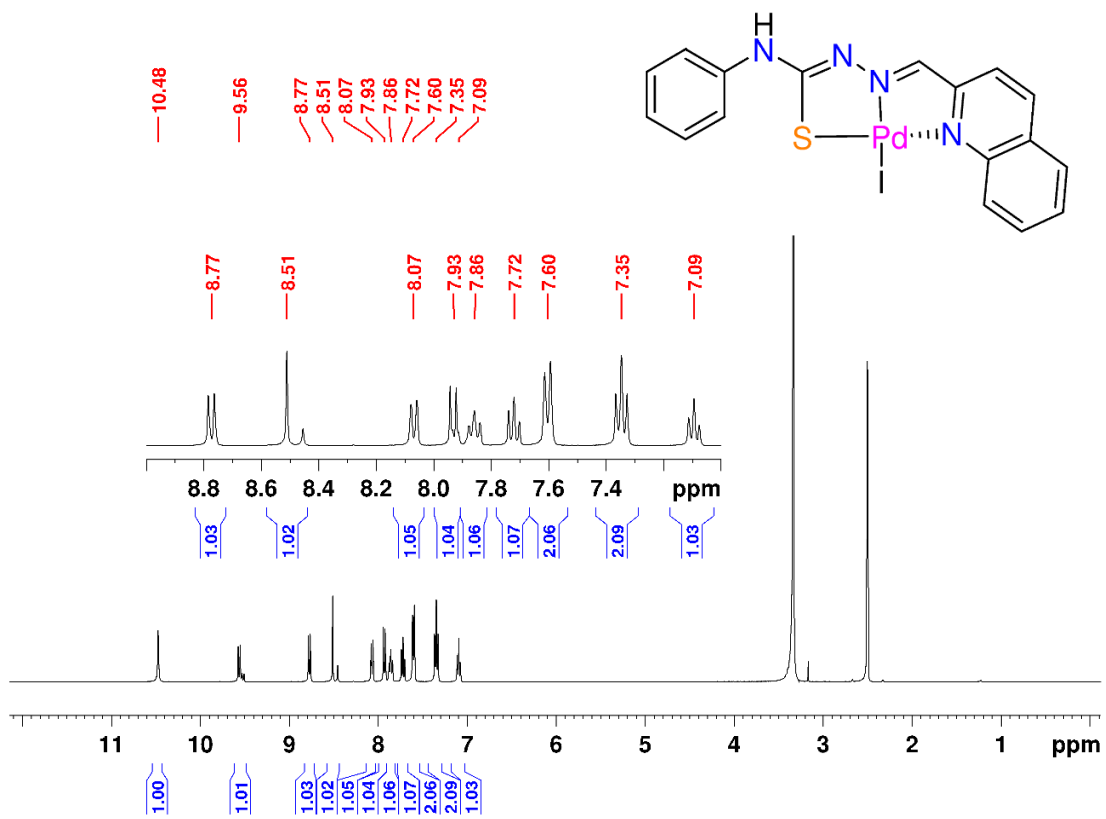

Fig. S5. <sup>1</sup>H NMR spectrum of 5.



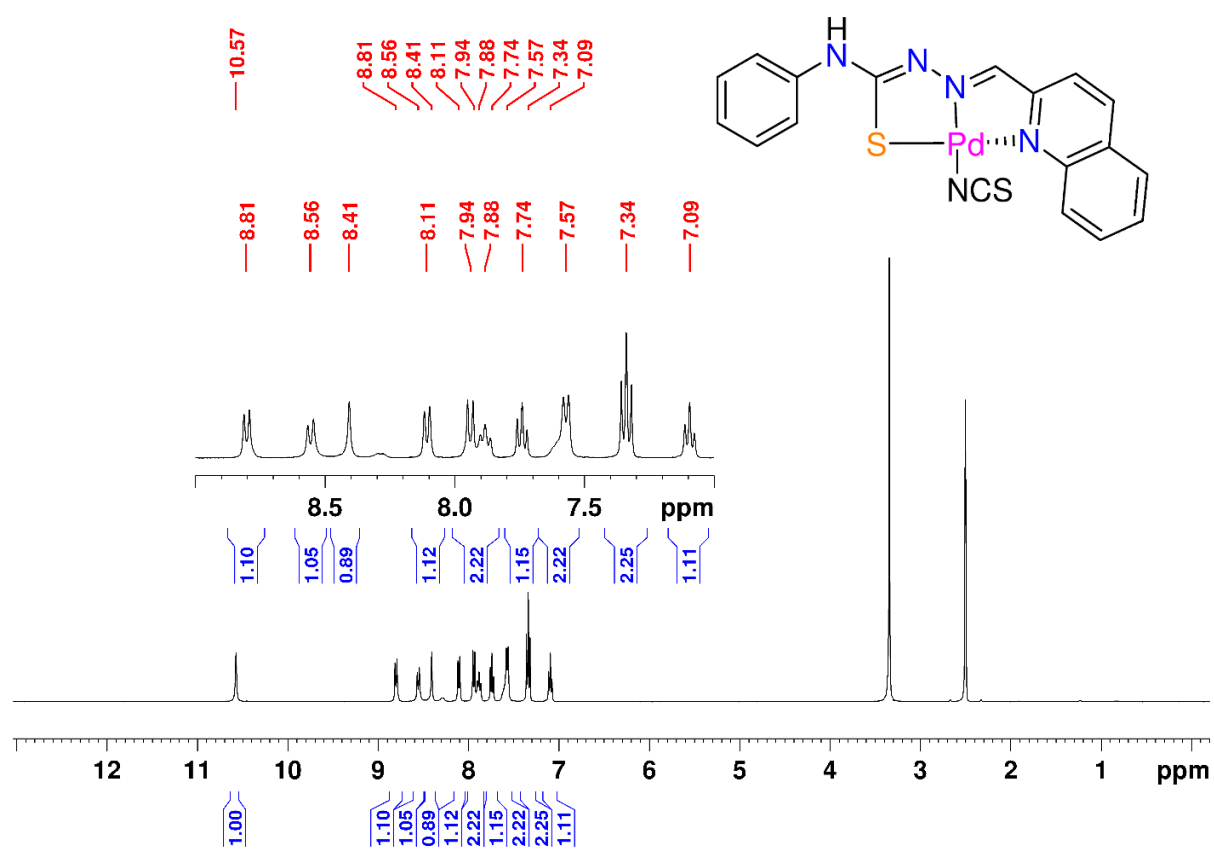

Fig. S6.  $^1\text{H}$  NMR spectrum of 6.

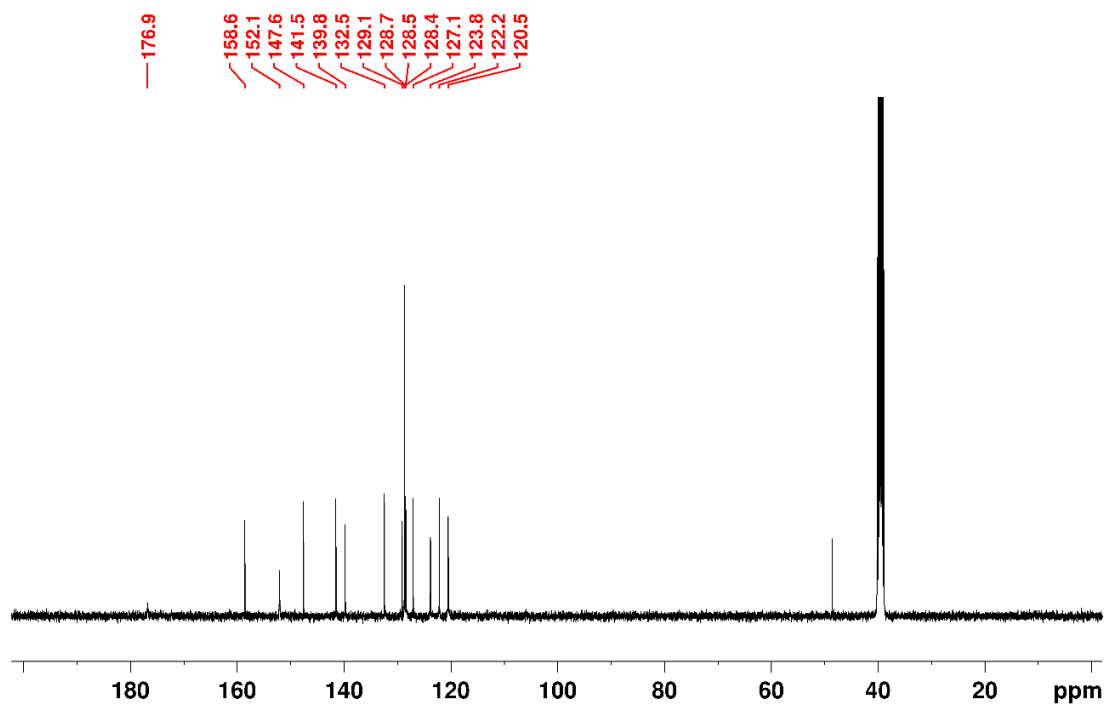

Fig. S7.  $^{13}\text{C}$  NMR spectrum of **3**.

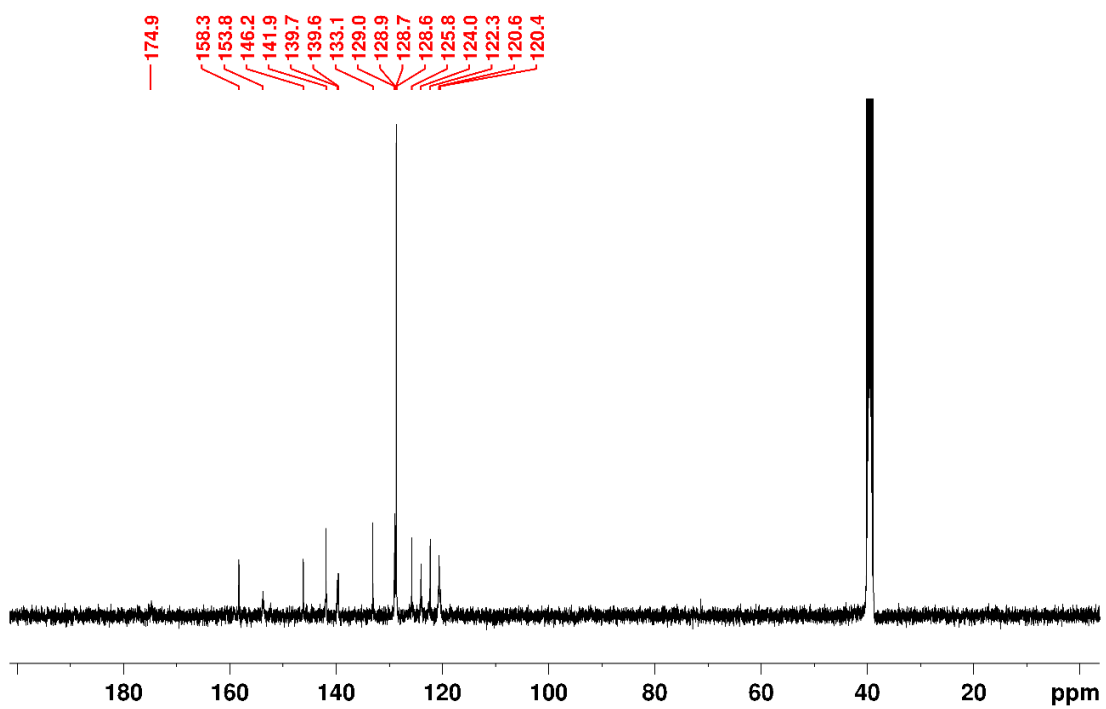

Fig. S8.  $^{13}\text{C}$  NMR spectrum of **6**.

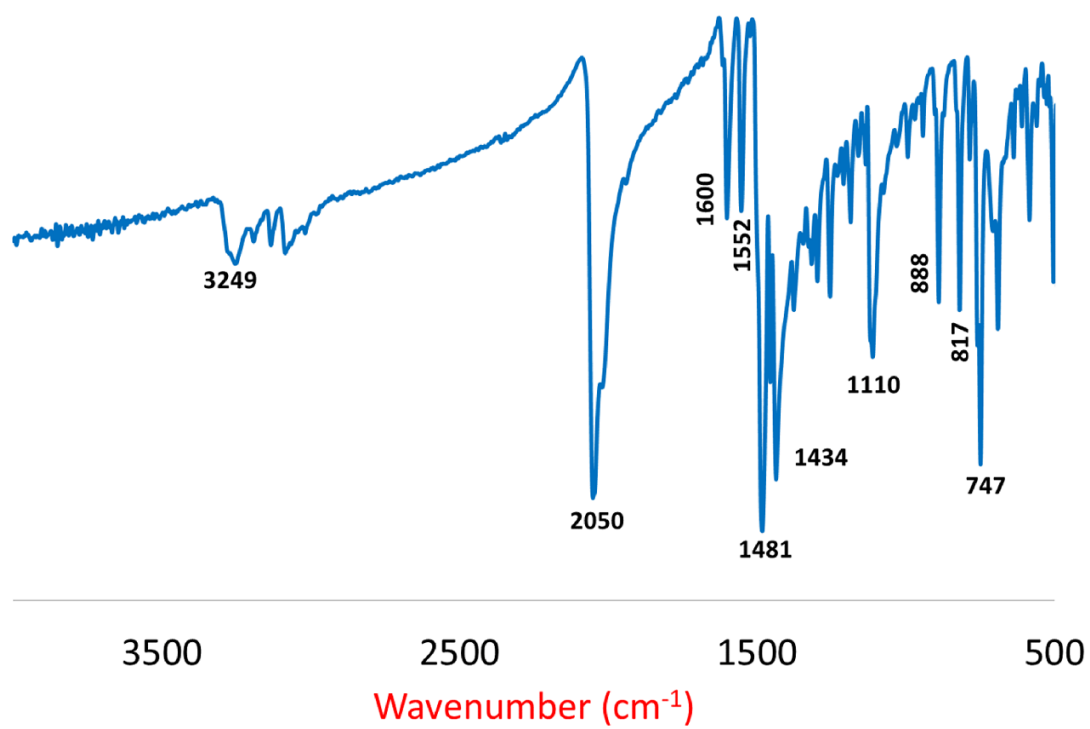

Fig. S9 IR spectrum of 7.

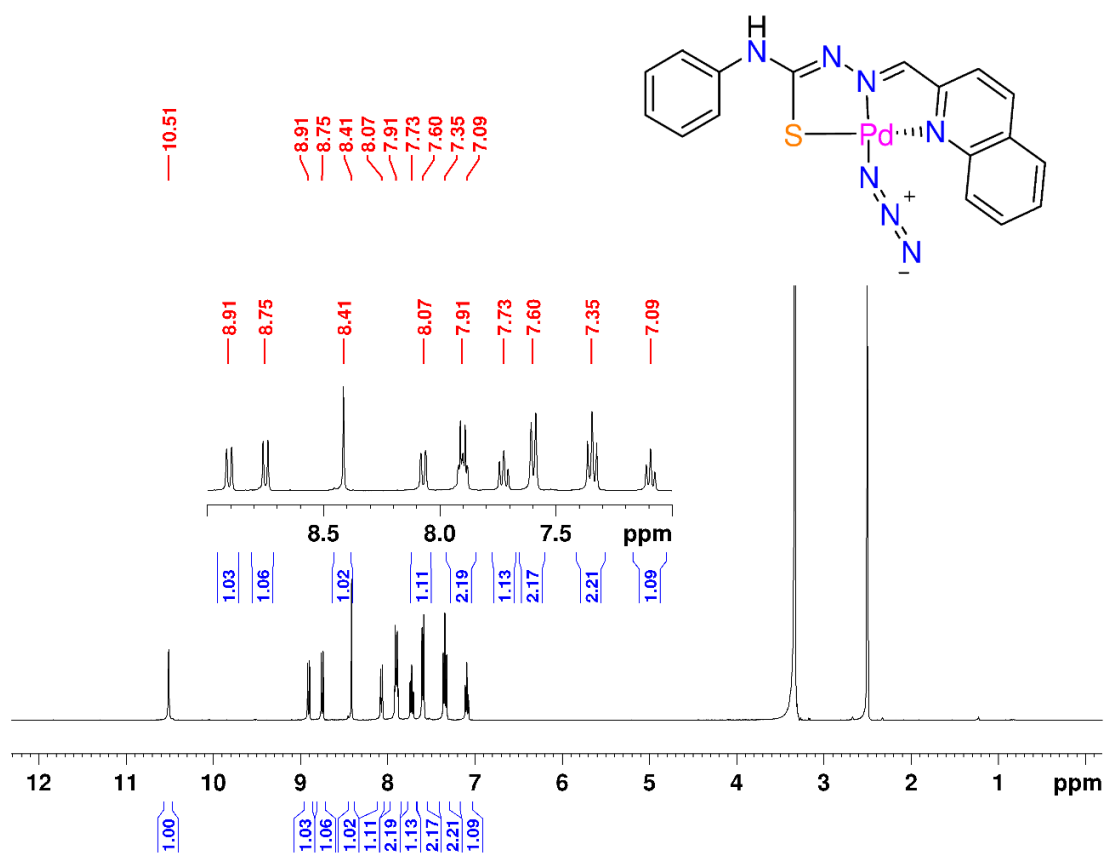

a)

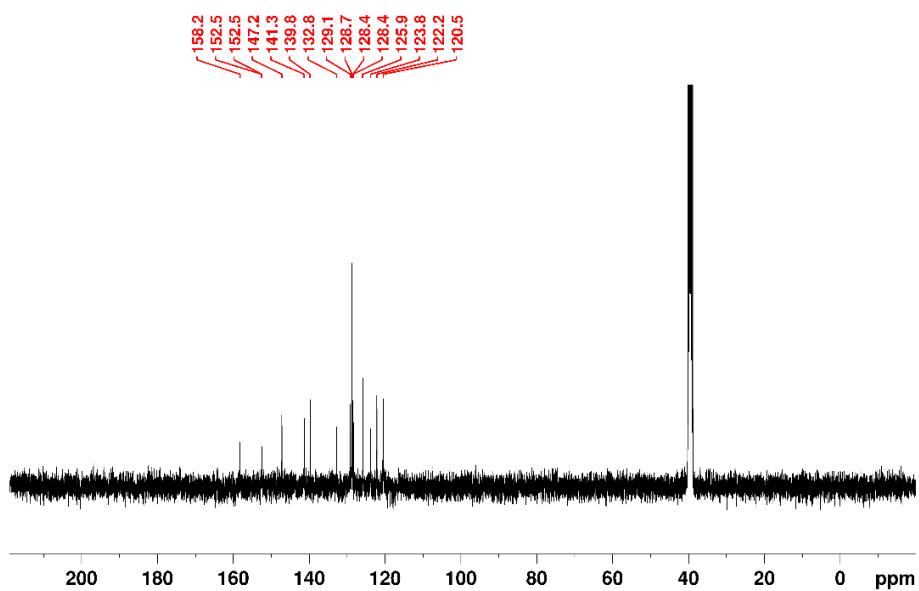

b)

Fig. S10. NMR spectra of 7 a) <sup>1</sup>H and b) <sup>13</sup>C.

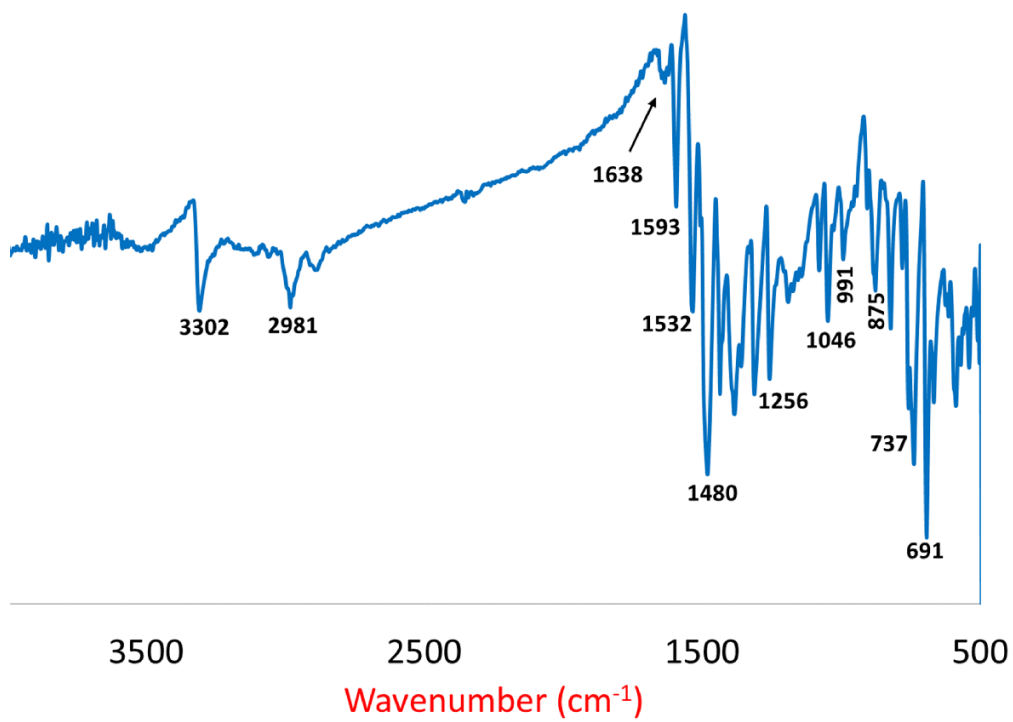

**Fig. S11** IR spectrum of **8**.

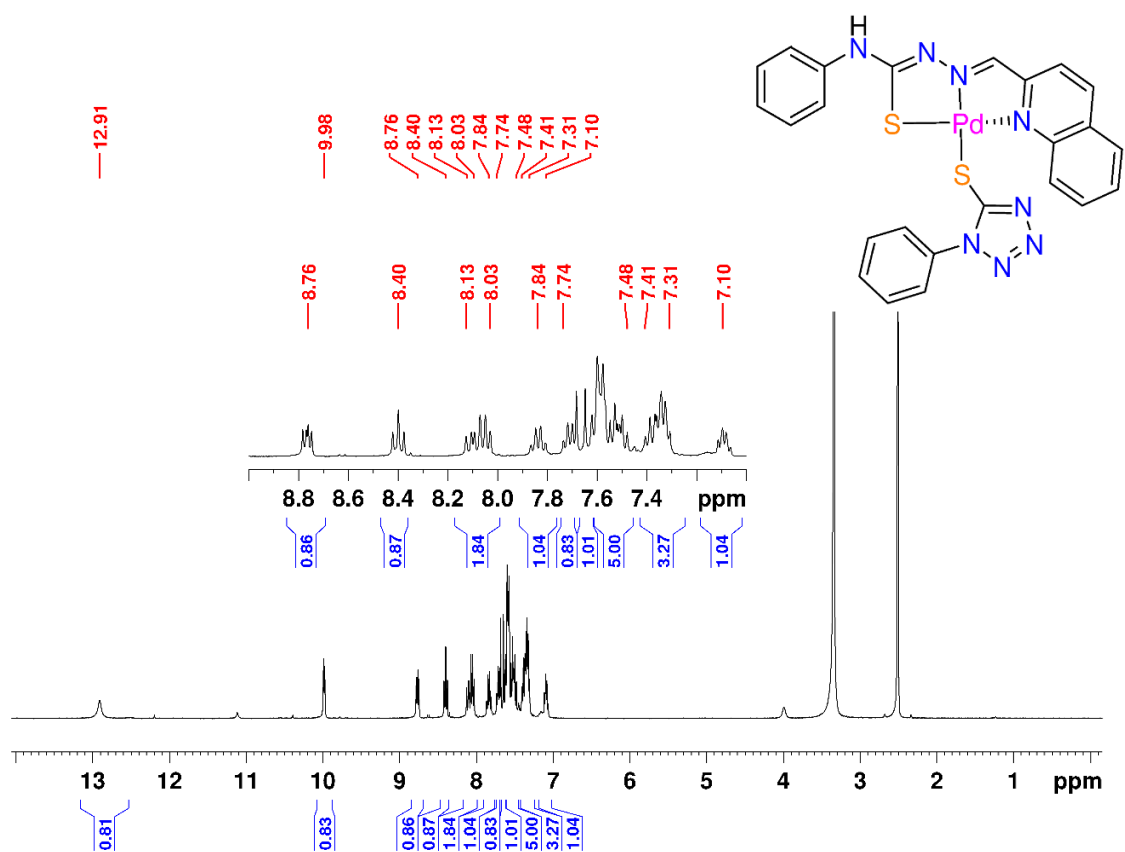

Fig. S12.  $^1\text{H}$  NMR spectrum of 8.

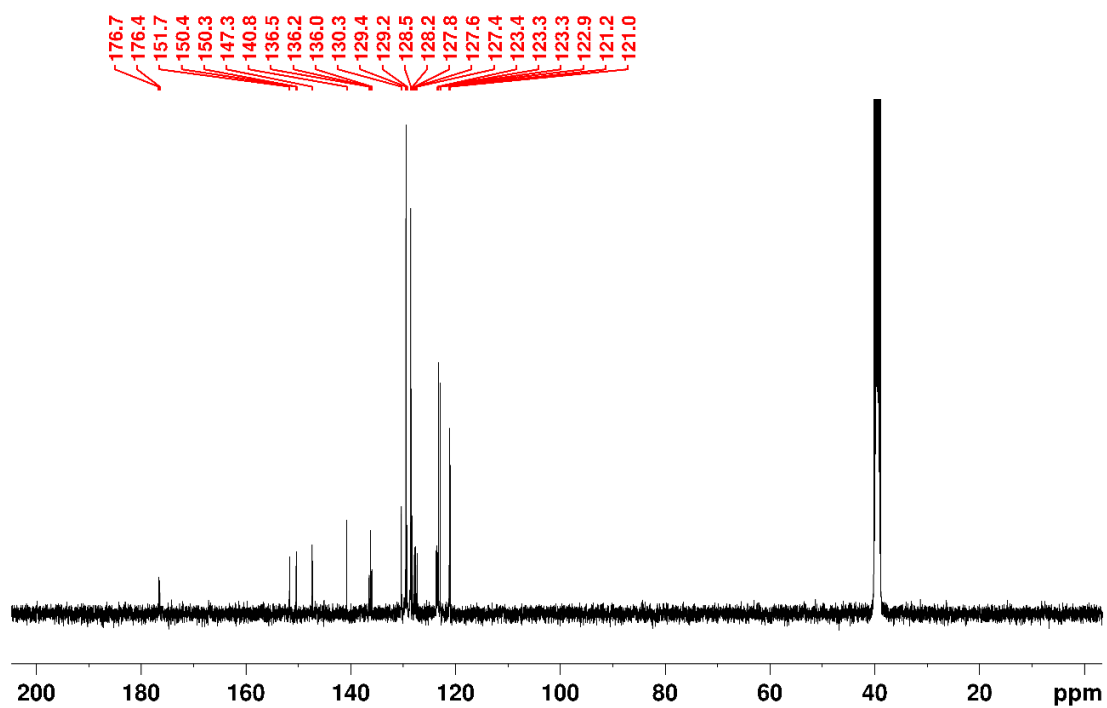

Fig. S13.  $^{13}\text{C}$  NMR spectrum of **8**.



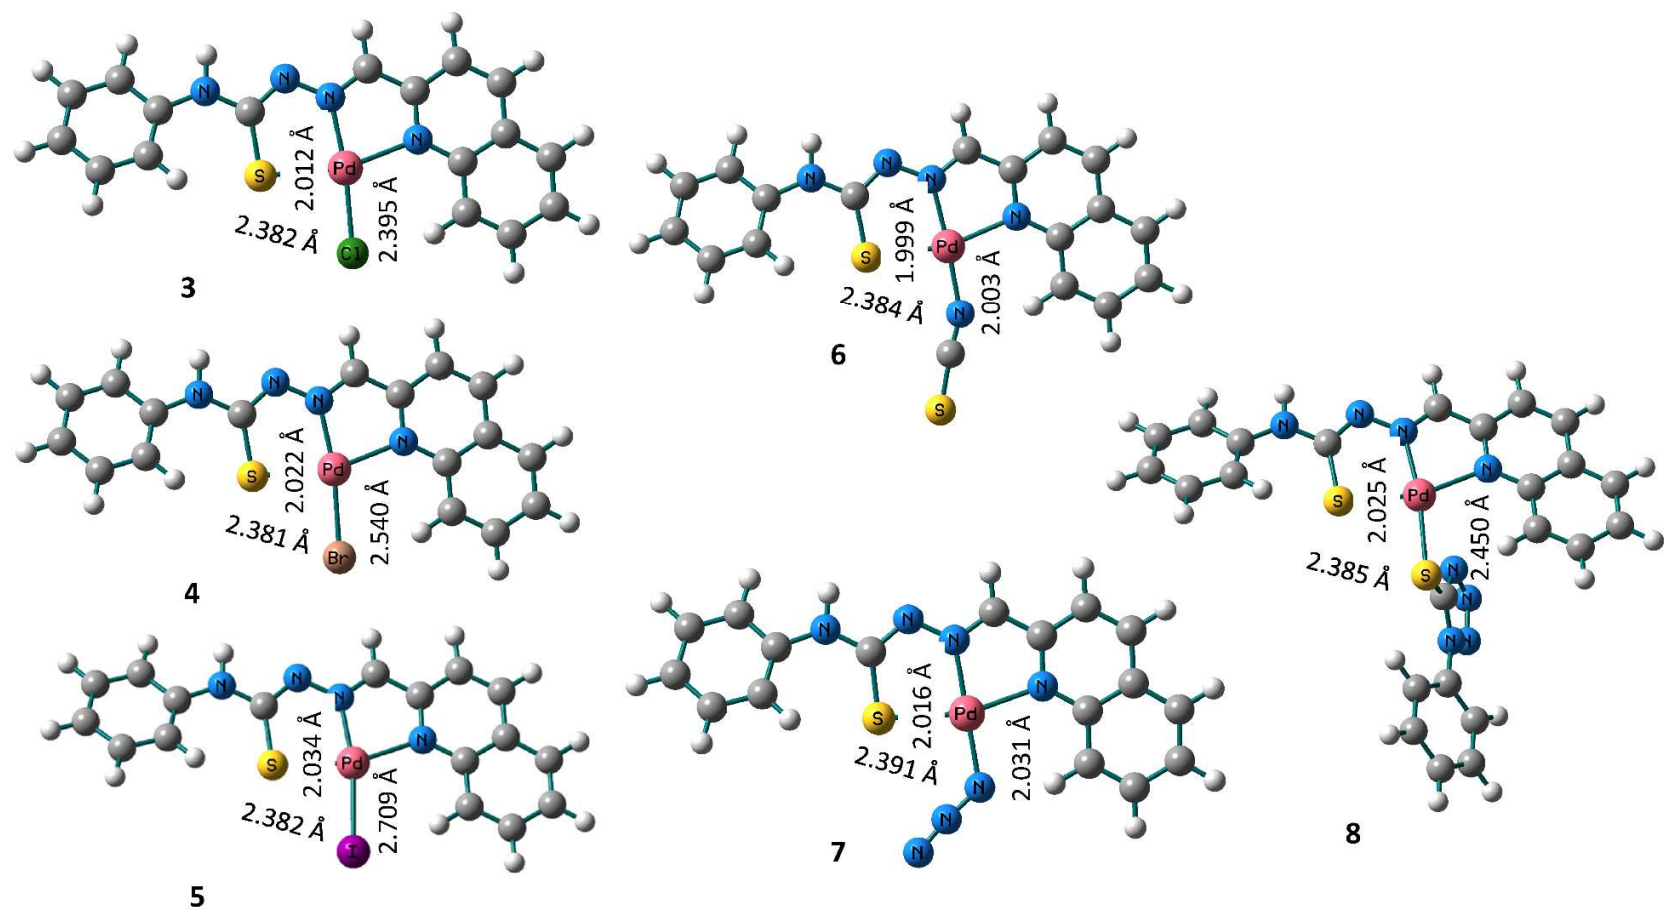

**Fig. S14.** The local minimum structures of **3–8** calculated at B3LYP/LANL2DZ level of theory. (Hydrogen-atoms were omitted for the clarity).

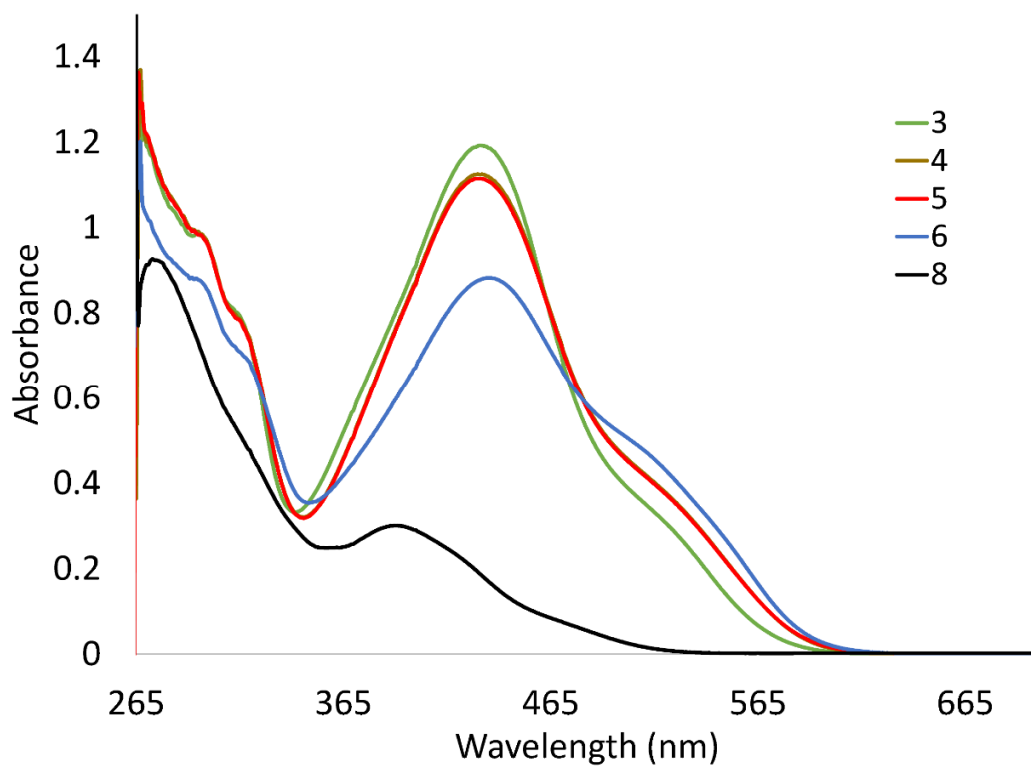

Fig. S15 Electronic absorption spectra of **3–8** in DMF.

**3:** HOMO-1

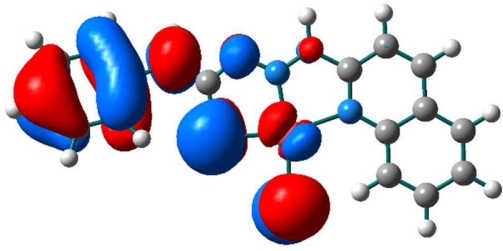

**3:** LUMO

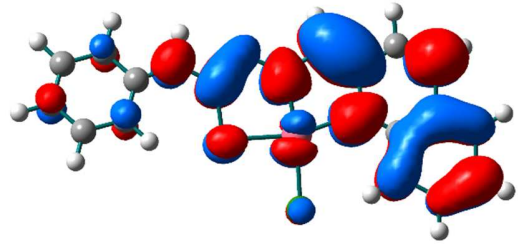

**4:** HOMO-1

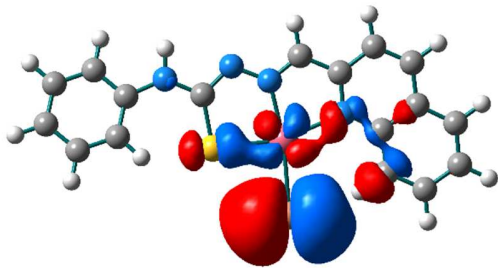

**4:** LUMO

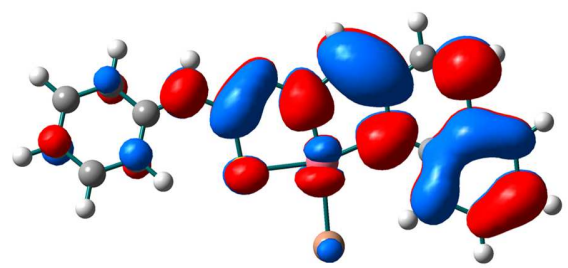

**5:** HOMO-1

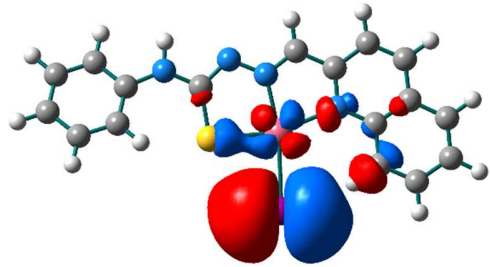

**5:** LUMO

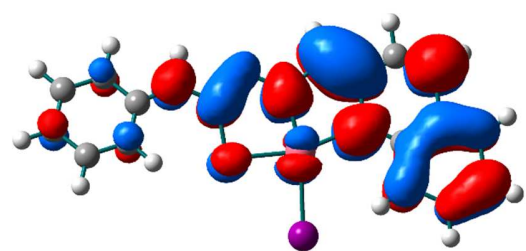

**6:** HOMO-1

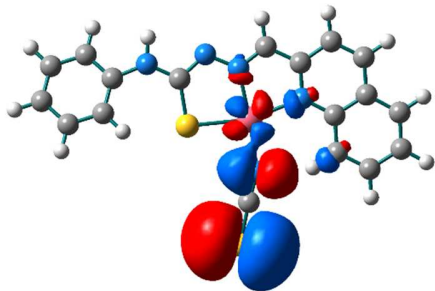

**6:** LUMO

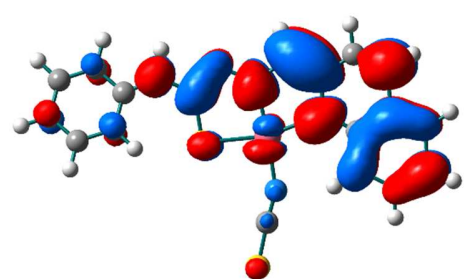

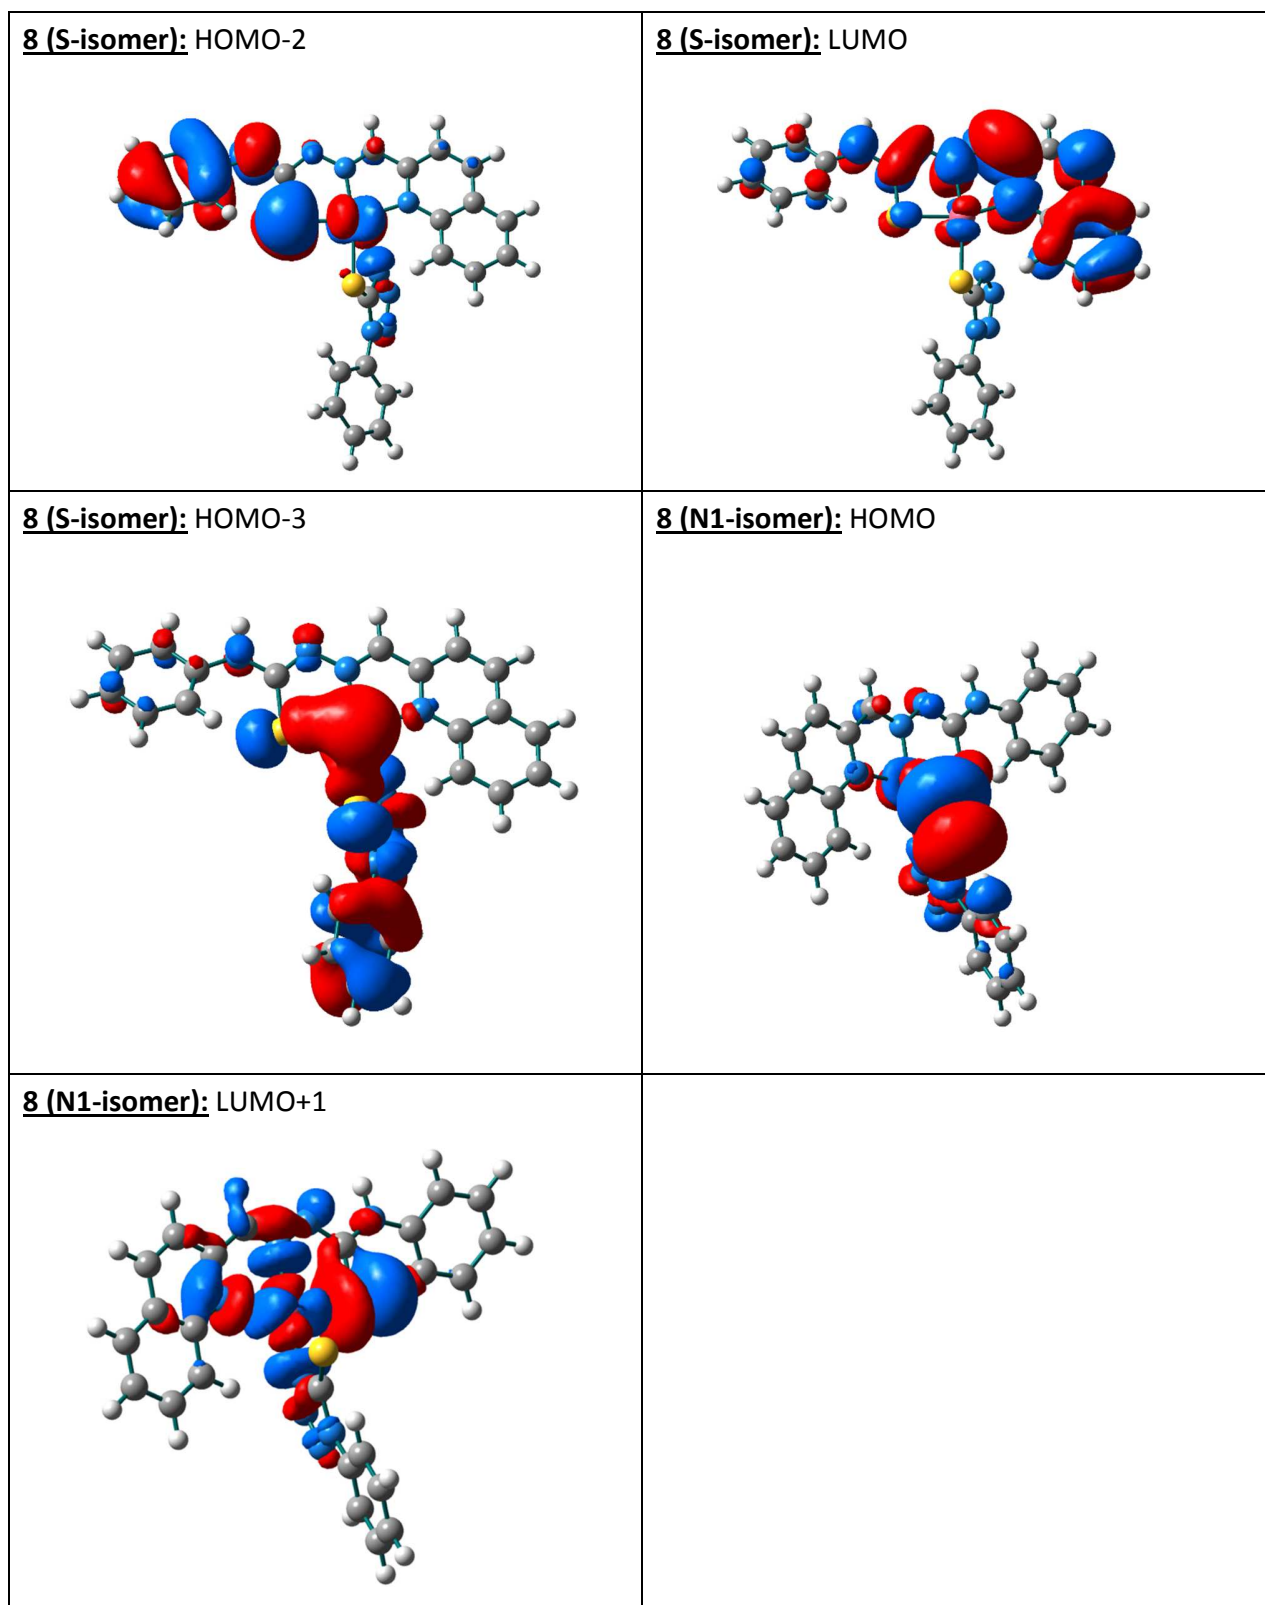

**Fig. S16** Selective frontiers molecular orbitals of **3–8**.

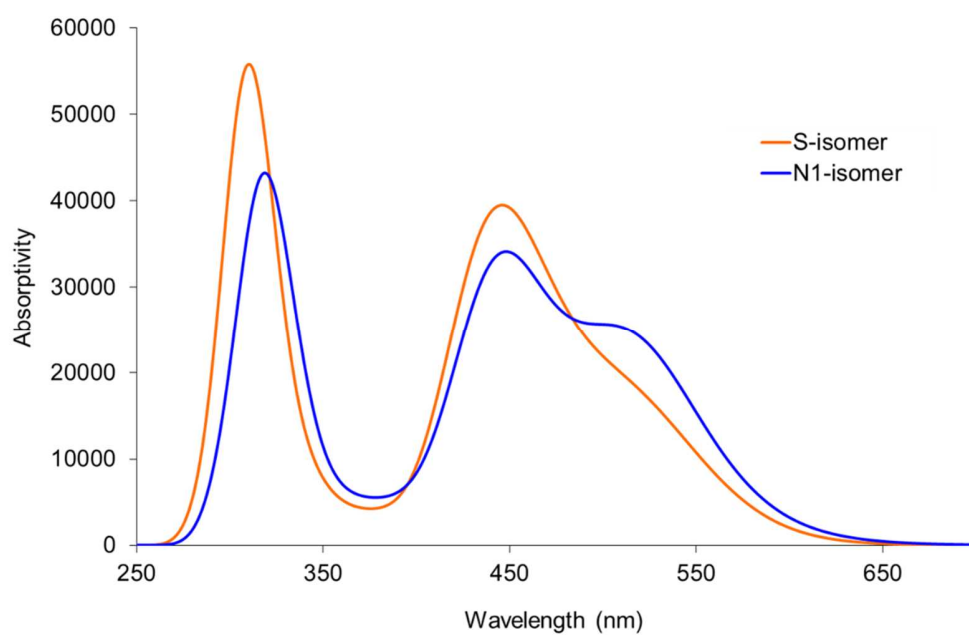

**Fig. S17** TDDFT spectra of S- and N1 isomers of **8**.

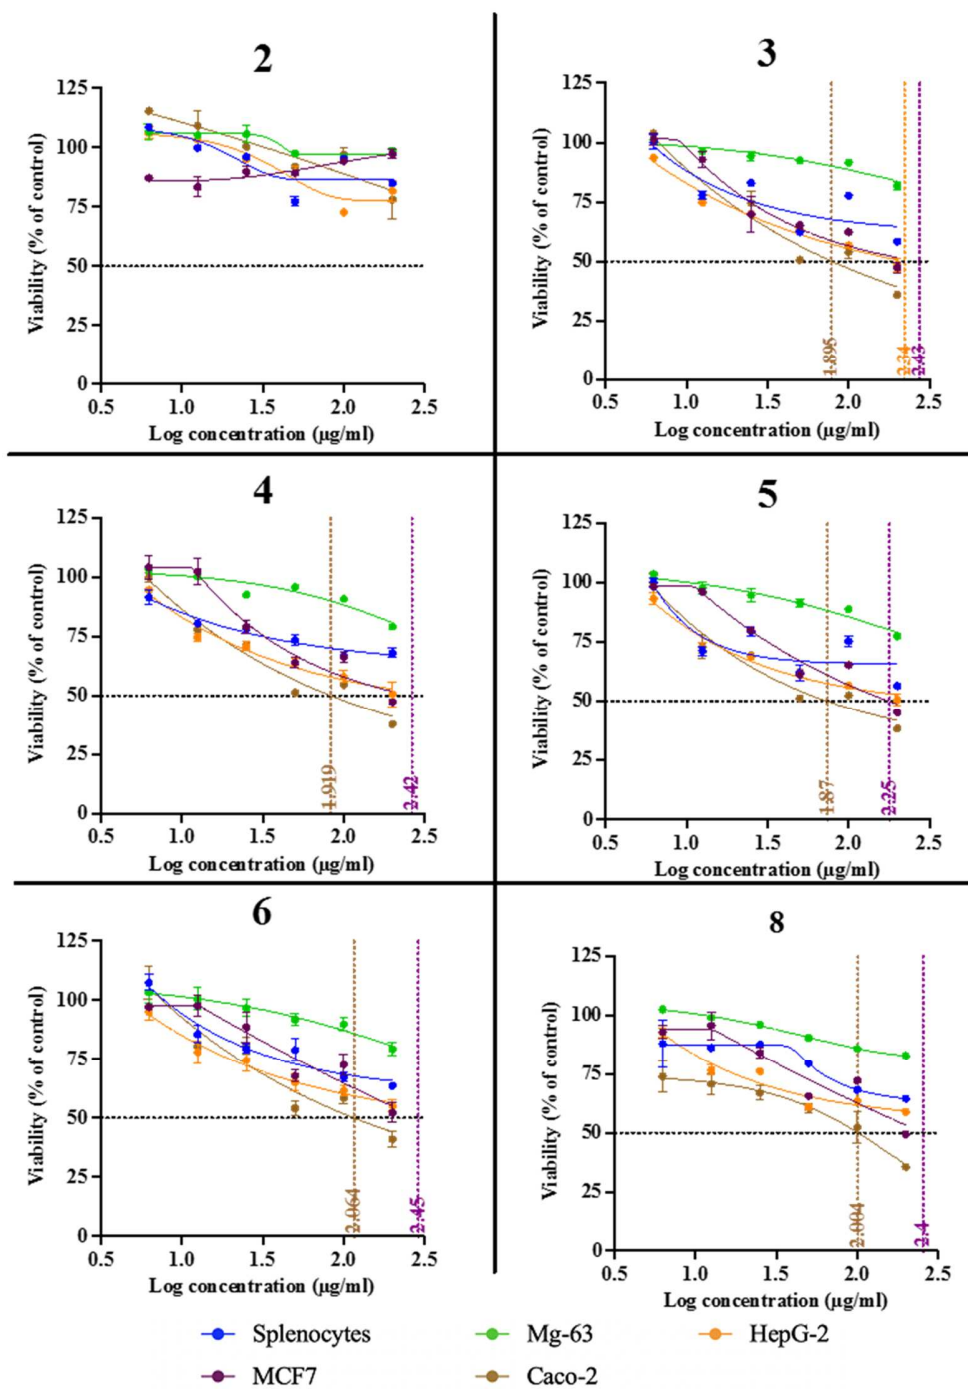

Fig. S18 The dose response curves of 2–8 on five different cell lines.
